# Supplementary material
Source: PubMed Central journal article supplement (PMC7611631)
Supplement: EMS133886-supplement-Supplementary_Information.pdf [file EMS133886-supplement-Supplementary_Information.pdf]

| <b>Supplementary table</b>                     |                                     |                           |                      |                    |                    |
|------------------------------------------------|-------------------------------------|---------------------------|----------------------|--------------------|--------------------|
| <b>List of antibodies used</b>                 |                                     |                           |                      |                    |                    |
| <b>Sr. No.</b>                                 | <b>Antibody</b>                     | <b>Clone</b>              | <b>Isotype</b>       | <b>Company</b>     | <b>Catalog no.</b> |
| 1                                              | Anti-mouse Periostin                | Polyclonal                | Goat IgG             | R&D                | AF2955             |
| 2                                              | Anti-mouse $\alpha$ -SMA            | Polyclonal                | Rabbit IgG           | Abcam              | ab5694             |
| 3                                              | Anti-mouse CD31                     | Polyclonal                | Goat IgG             | R&D                | AF3628             |
| 4                                              | Biotin anti-mouse CD31              | MEC13.3                   | Rat IgG2a, $\kappa$  | Biolegend          | 102504             |
| 5                                              | Anti-Collagen-IV                    | Polyclonal                | Rabbit IgG           | abcam              | ab6586             |
| 6                                              | Anti-Laminin                        | Polyclonal                | Rabbit IgG           | abcam              | ab11575            |
| 7                                              | Anti-CD169                          | 3D6.112                   | Rat IgG2a, $\kappa$  | Biolegend          | 142419             |
| 8                                              | Anti- $\alpha$ -smooth muscle actin | 1A4                       | Mouse IgG2a          | R and D            | MAB1420            |
| 9                                              | Fab Fragment                        | Polyclonal                | Goat IgG             | Jackson Imm.       | 115-007-003        |
| 10                                             | Anti-mouse Gr-1 FITC                | RB6-8C5                   | Rat IgG2b, $\kappa$  | eBioscience        | 11-5931-85         |
| 11                                             | Anti-mouse CD3e FITC                | 145-2C11                  | Arm. Ham. IgG        | eBioscience        | 11-0031-85         |
| 12                                             | Anti-mouse B220 FITC                | RA3-6B2                   | Rat IgG2a, $\kappa$  | eBioscience        | 11-0452-82         |
| 13                                             | Anti-mouse Ter119 FITC              | TER-119                   | Rat IgG2b, $\kappa$  | BD Biosciences     | 557915             |
| 14                                             | Anti-mouse CD11b FITC               | M1/70                     | Rat IgG2b, $\kappa$  | BD Biosciences     | 557396             |
| 15                                             | Anti-mouse CD48 FITC                | HM48-1                    | Arm. Ham. IgG        | eBioscience        | 11-0481-85         |
| 16                                             | Anti-mouse CD48 APC-Cy7             | HM48-1                    | Arm. Ham. IgG        | BioLegend          | 103432             |
| 17                                             | Anti-mouse c-kit APC                | 2B8                       | Rat IgG2b, $\kappa$  | BioLegend          | 105812             |
| 18                                             | Anti-mouse c-kit APC-Cy7            | 2B8                       | Rat IgG2b, $\kappa$  | BioLegend          | 105826             |
| 19                                             | Anti-mouse CD51 PE                  | RMV-7                     | Rat IgG1, $\kappa$   | BD Biosciences     | 551187             |
| 20                                             | Anti-mouse CD61 PE                  | 2C9.G3                    | Arm. Ham. IgG        | eBioscience        | 12-0611-83         |
| 21                                             | Anti-mouse CD61 AF647               | 2C9.G2 (HM $\beta$ 3-1)   | Arm. Ham. IgG        | BioLegend          | 104314             |
| 22                                             | Anti-mouse Sca-1 BB700              | D7                        | Rat IgG2a, $\kappa$  | BD Biosciences     | 742089             |
| 23                                             | Anti-CD150 PE-Cy7                   | TC15-12F12.2              | Rat IgG2a, $\lambda$ | BioLegend          | 115914             |
| <b>List of Isotype control antibodies used</b> |                                     |                           |                      |                    |                    |
| <b>Sr. No.</b>                                 | <b>Antibody</b>                     | <b>Clone</b>              | <b>Company</b>       | <b>Catalog no.</b> |                    |
| 1                                              | FITC Rat IgG2b, $\kappa$            | eB149/10H5                | eBioscience          | 11-4031-82         |                    |
| 2                                              | FITC Arm Ham. IgG                   | eBio299Arm                | eBioscience          | 11-4888-81         |                    |
| 3                                              | FITC Rat IgG2a, $\kappa$            | eBR2a                     | eBioscience          | 11-4321-82         |                    |
| 4                                              | APC Rat IgG 2b, $\kappa$            | eB149/10H5                | eBioscience          | 17-4031-82         |                    |
| 5                                              | PerCP-Cy5.5 Rat IgG2a, $\kappa$     | eBR2a                     | eBioscience          | 45-4321-80         |                    |
| 6                                              | PECy7 Rat IgG2a                     | 2A3                       | Tonbo biosci.        | 60-4321-U100       |                    |
| 7                                              | APC Arm Ham. IgG                    | eBio299Arm                | eBioscience          | 17-4888-82         |                    |
| 8                                              | APCCy7 Rat IgG 2b, $\kappa$         | eB149/10H5                | eBioscience          | 17-4031-82         |                    |
| <b>List of primers used</b>                    |                                     |                           |                      |                    |                    |
| 1                                              | Genotyping Postn mice (F)           | GGTGCTTCTGTAAGGCCATC      |                      |                    |                    |
| 2                                              | Genotyping Postn mice (R)           | GTGAGCCAGGACCTTGTCATA     |                      |                    |                    |
| 3                                              | Genotyping Postn mice (Int-as)      | AGCACTGACTGCGTTAGCAA      |                      |                    |                    |
| 4                                              | Genotyping Itgav mice (F)           | GGTGACTCAATCTGTGACCTTCAGC |                      |                    |                    |
| 5                                              | Genotyping Itgav mice (R)           | CACAAATCAAGGATGACCAAAGTGG |                      |                    |                    |
| 6                                              | Genotyping Vav-iCre mice (F)        | CCATGGCACCCAAGAAGAAG      |                      |                    |                    |
| 7                                              | Genotyping Vav-iCre mice (R)        | GCTTAGTTTTCTGCAGCGG       |                      |                    |                    |
| 8                                              | Mm Postn (F)                        | AGTTTGTTCGTGGCAGCACCTT    |                      |                    |                    |
| 9                                              | Mm Postn (R)                        | TCGTCATTGCAGGTCCTCCGT     |                      |                    |                    |

# Suppl. Fig. 1

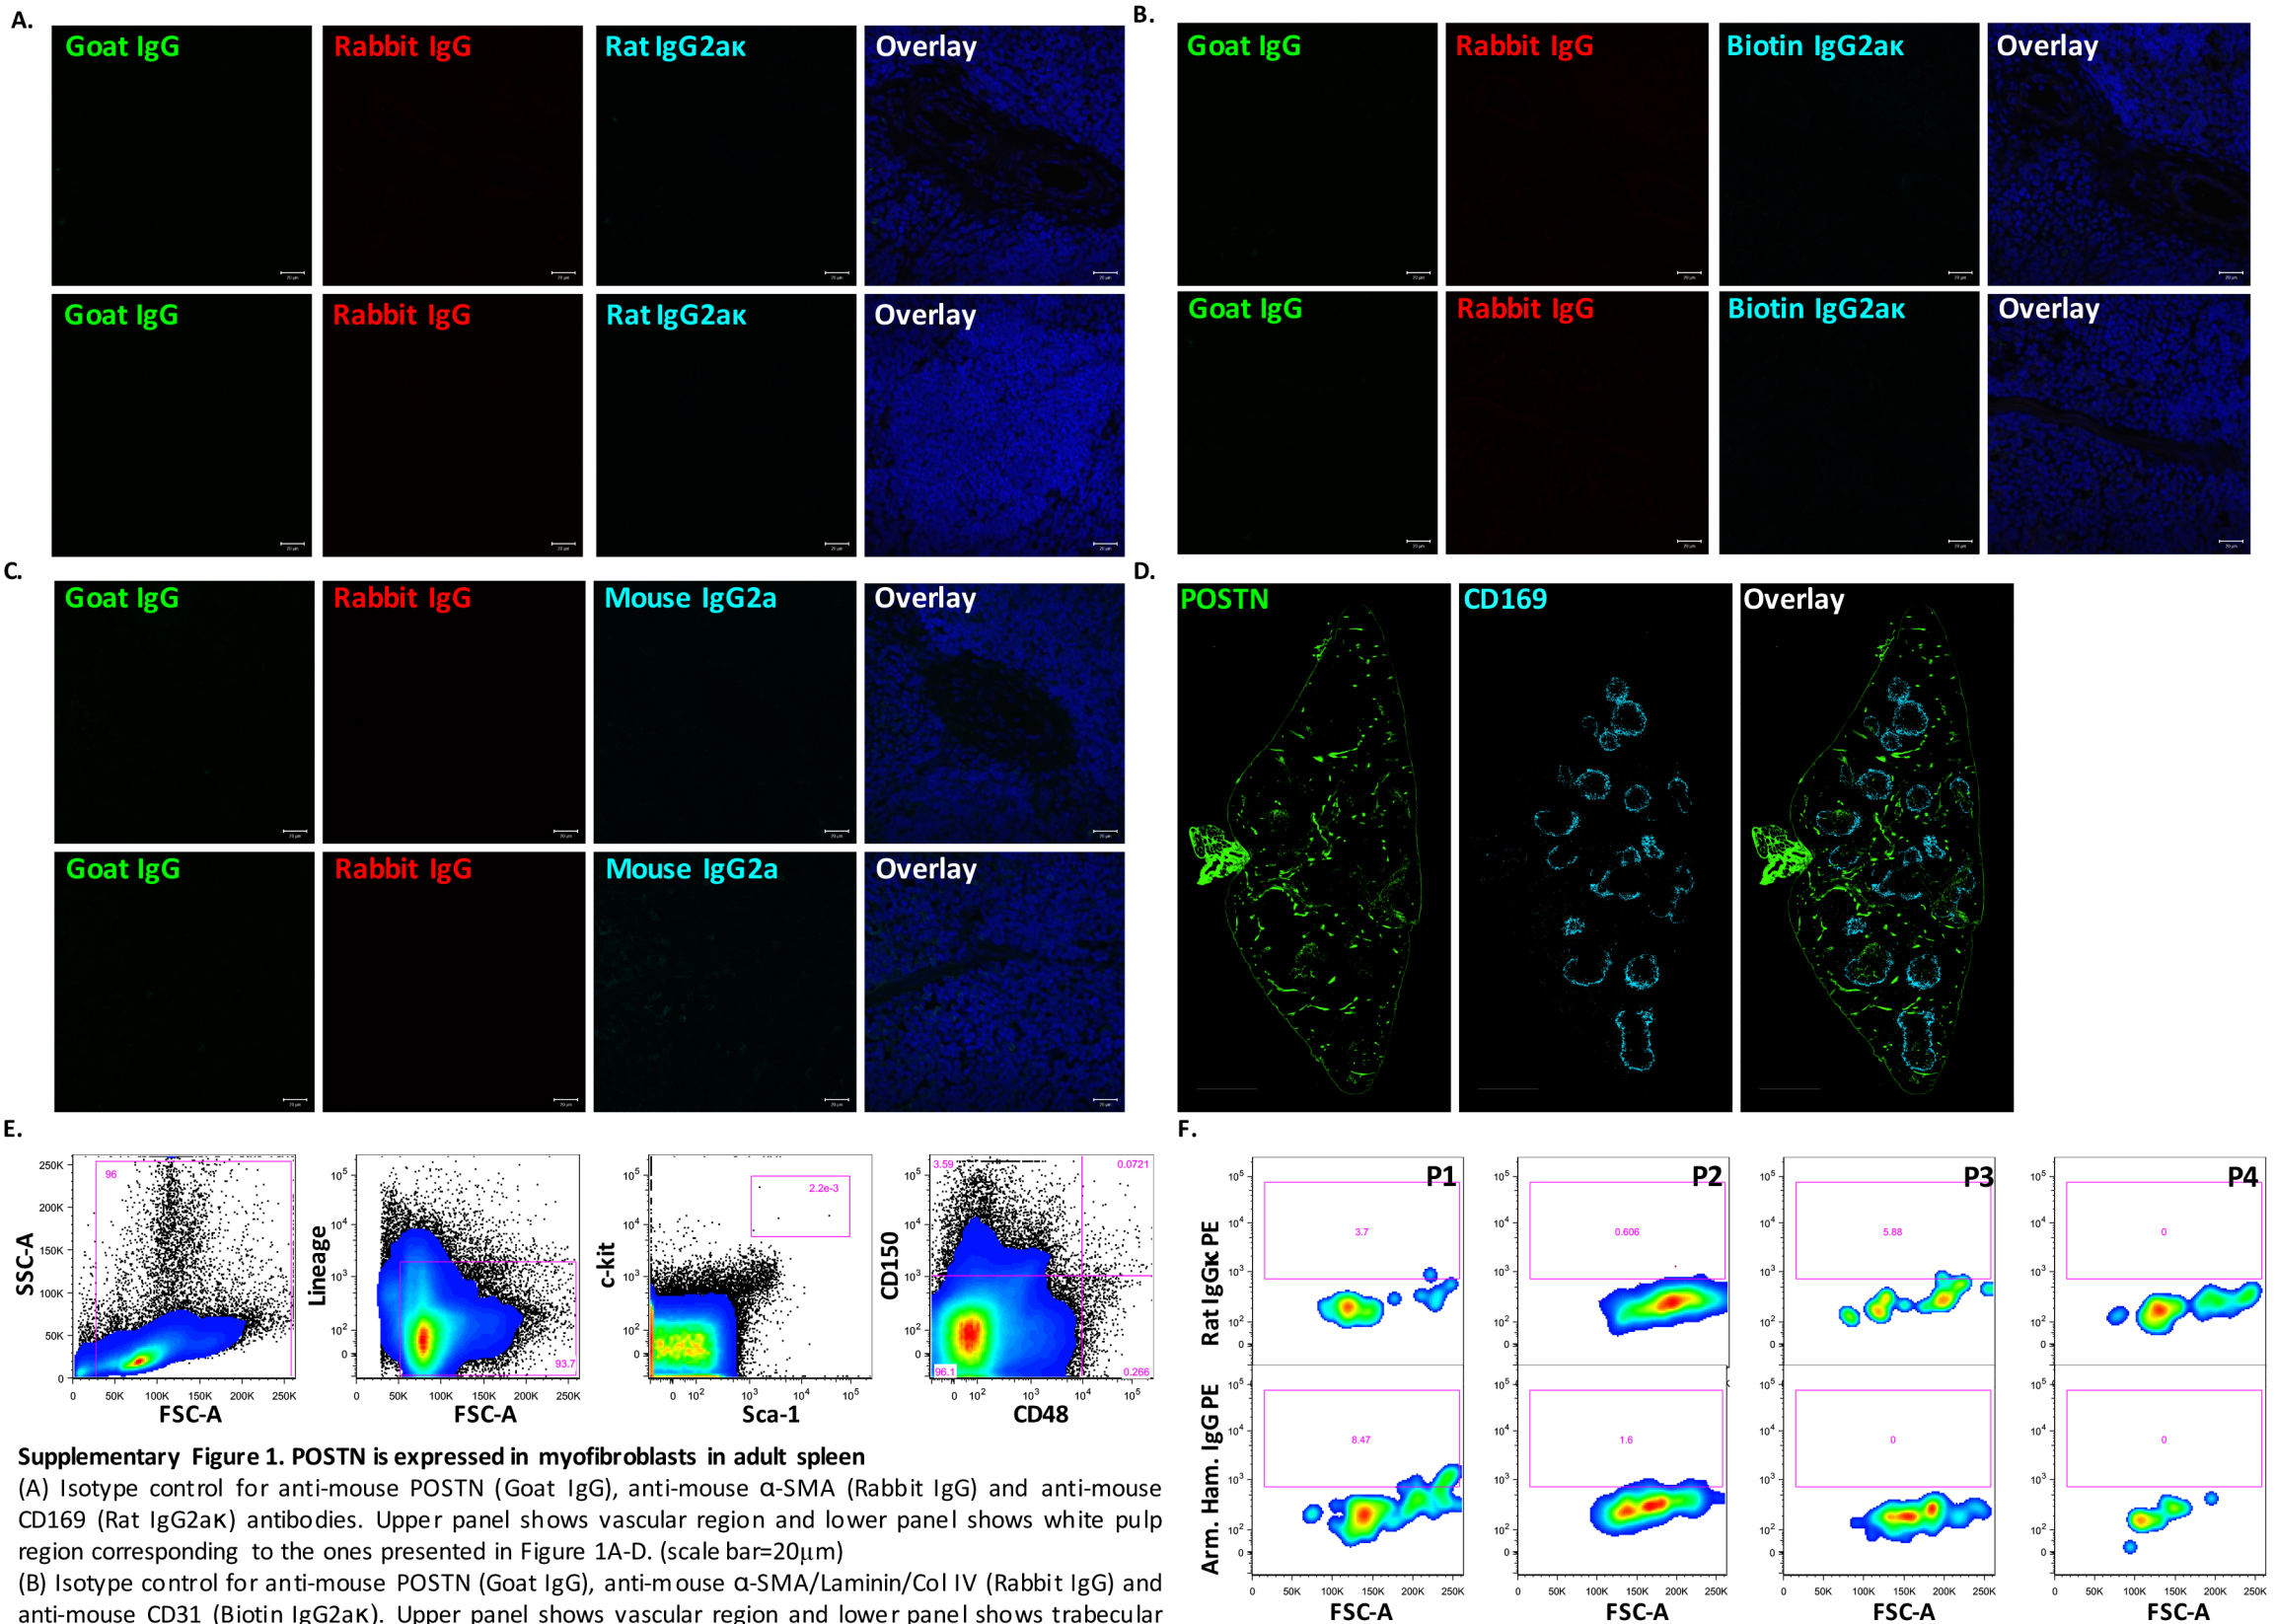

## Supplementary Figure 1. POSTN is expressed in myofibroblasts in adult spleen

(A) Isotype control for anti-mouse POSTN (Goat IgG), anti-mouse  $\alpha$ -SMA (Rabbit IgG) and anti-mouse CD169 (Rat IgG2ak) antibodies. Upper panel shows vascular region and lower panel shows white pulp region corresponding to the ones presented in Figure 1A-D. (scale bar=20 $\mu$ m)

(B) Isotype control for anti-mouse POSTN (Goat IgG), anti-mouse  $\alpha$ -SMA/Laminin/Col IV (Rabbit IgG) and anti-mouse CD31 (Biotin IgG2ak). Upper panel shows vascular region and lower panel shows trabecular region corresponding to the ones presented in Figure 1E and 2A. (scale bar=20 $\mu$ m)

(C) Isotype control for anti-mouse POSTN (Goat IgG), anti-mouse Laminin/Col IV (Rabbit IgG) and anti-mouse  $\alpha$ -SMA (Mouse IgG2a). Upper panel shows vascular region and lower panel shows trabecular region corresponding to the ones presented in Figure 2B,C. (scale bar=20 $\mu$ m)

(D) POSTN expression was examined in the adult spleen tissues using immunohistochemistry on 10 $\mu$ m cryo-sections followed by fluorescence imaging using tile scan. Specific antibodies were used to identify the cells expressing POSTN, macrophages lining the WP areas were identified by using CD169 staining, nuclear counterstaining was done using Hoechst 33342. (n=2, N=8, scale bar=0.5mm).

(E) Scheme followed to gate the four sub-populations within the LSK cell population on the basis of isotype controls.

(F) Fluorescence minus one (FMO) controls to examine the proportion of HSPC sub-populations expressing ITGAV (upper panel) and ITGB3 (lower panel). The sub-populations were identified based on the expression of CD150 and CD48 within LSK fraction. Isotype control antibodies for ITGAV and ITGB3 were used to set the gates.

## Suppl. Fig. 2

A.

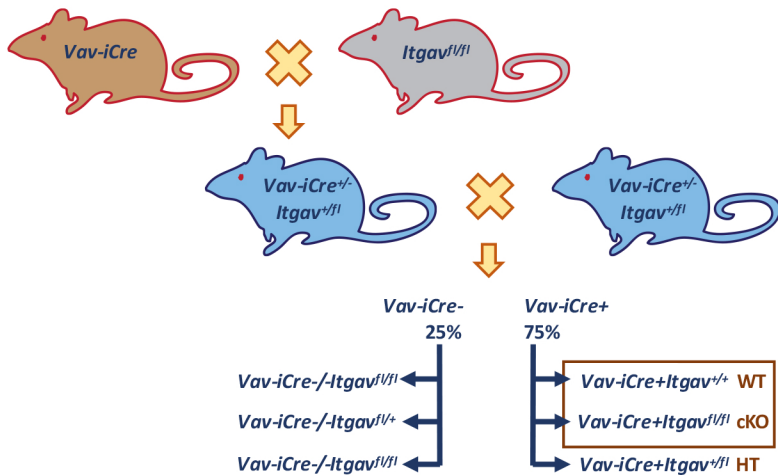

B.

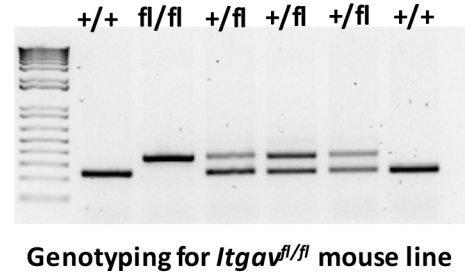

C.

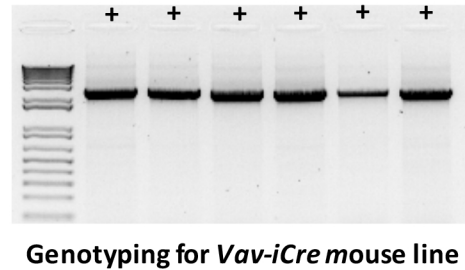

D.

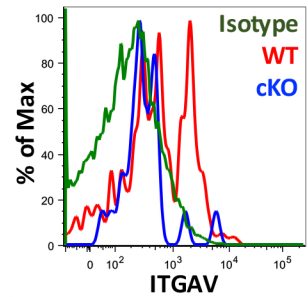

E.

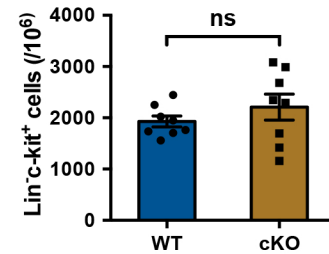

F.

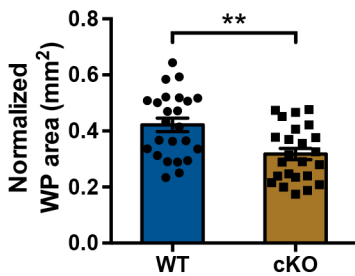

G.

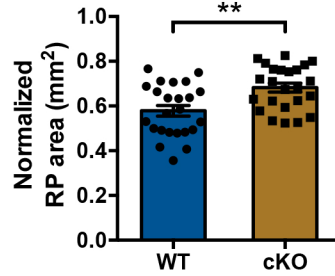

H.

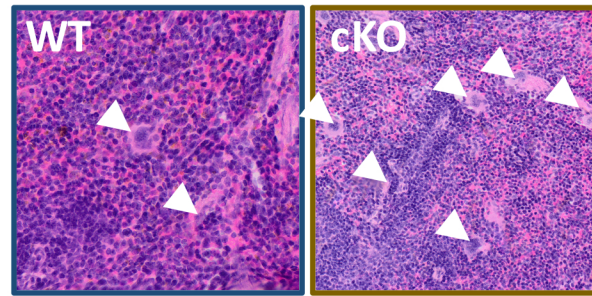

I.

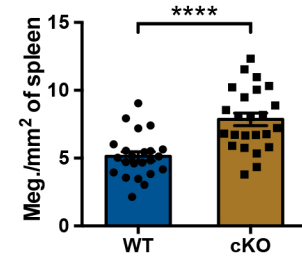

### Supplemental Figure 2. *Itgav* deletion leads to poorer lymphopoietic function

(A) Schematic representation of breeding scheme used to generate  $Vav-iCre^{+};Itgav^{+/+}$  (WT) and  $Vav-iCre^{+};Itgav^{-/-}$  (cKO) mice.  $Vav-iCre$  and  $Itgav^{fl/fl}$  mice were crossed to delete *Itgav* in the hematopoietic cells.

(B,C) Genotyping PCR performed on tail-tip DNA to identify  $Vav-iCre^{+};Itgav^{+/+}$  (WT),  $Vav-iCre^{+};Itgav^{fl/+}$  (HT) and  $Vav-iCre^{+};Itgav^{-/-}$  (cKO) mice. PCR was performed to identify *Itgav*<sup>fl</sup>/*Itgav*<sup>+</sup> (B) and *Vav-iCre* (C) alleles, separately.

(D) Confirmation of *Itgav* deletion in HSPC population by flow cytometry. Spleen derived MNCs were immunostained to detect ITGAV expression on HSPCs (LSK cells). Cell surface expression of ITGAV in LSK population was compared between  $Vav-Itgav^{+/+}$  and  $Vav-Itgav^{-/-}$  samples.

(E) Mononuclear cells from  $Vav-Itgav^{+/+}$  (WT),  $Vav-Itgav^{-/-}$  (cKO) spleen tissues were used for the analysis of HSPC (lin<sup>c-kit</sup><sup>+</sup> cells) frequency by flow cytometry (n=8).

(F,G) Spleen tissues isolated from WT and cKO animals were harvested. The formalin-fixed, paraffin-embedded tissues were used to cut 10 $\mu$ m sections that were used for H&E staining. (F) The total cross-sectional area under white pulp (WP), and (G) red pulp (RP) was compared between WT and cKO spleen tissues (n=4, N=24).

(H) Histological examination of the WT and cKO spleen sections to identify megakaryocytes (white arrow heads) on the basis of morphological features.

(I) Comparison of megakaryocyte frequency in spleen sections per  $mm^2$  of the total cross-sectional area. (n=4, N=24)

Unpaired two tailed Student's t-test was performed. \* p<0.05, \*\* p<0.01, \*\*\* p<0.001, \*\*\*\* p<0.0001, ns indicates not significant.

## Suppl. Fig. 3

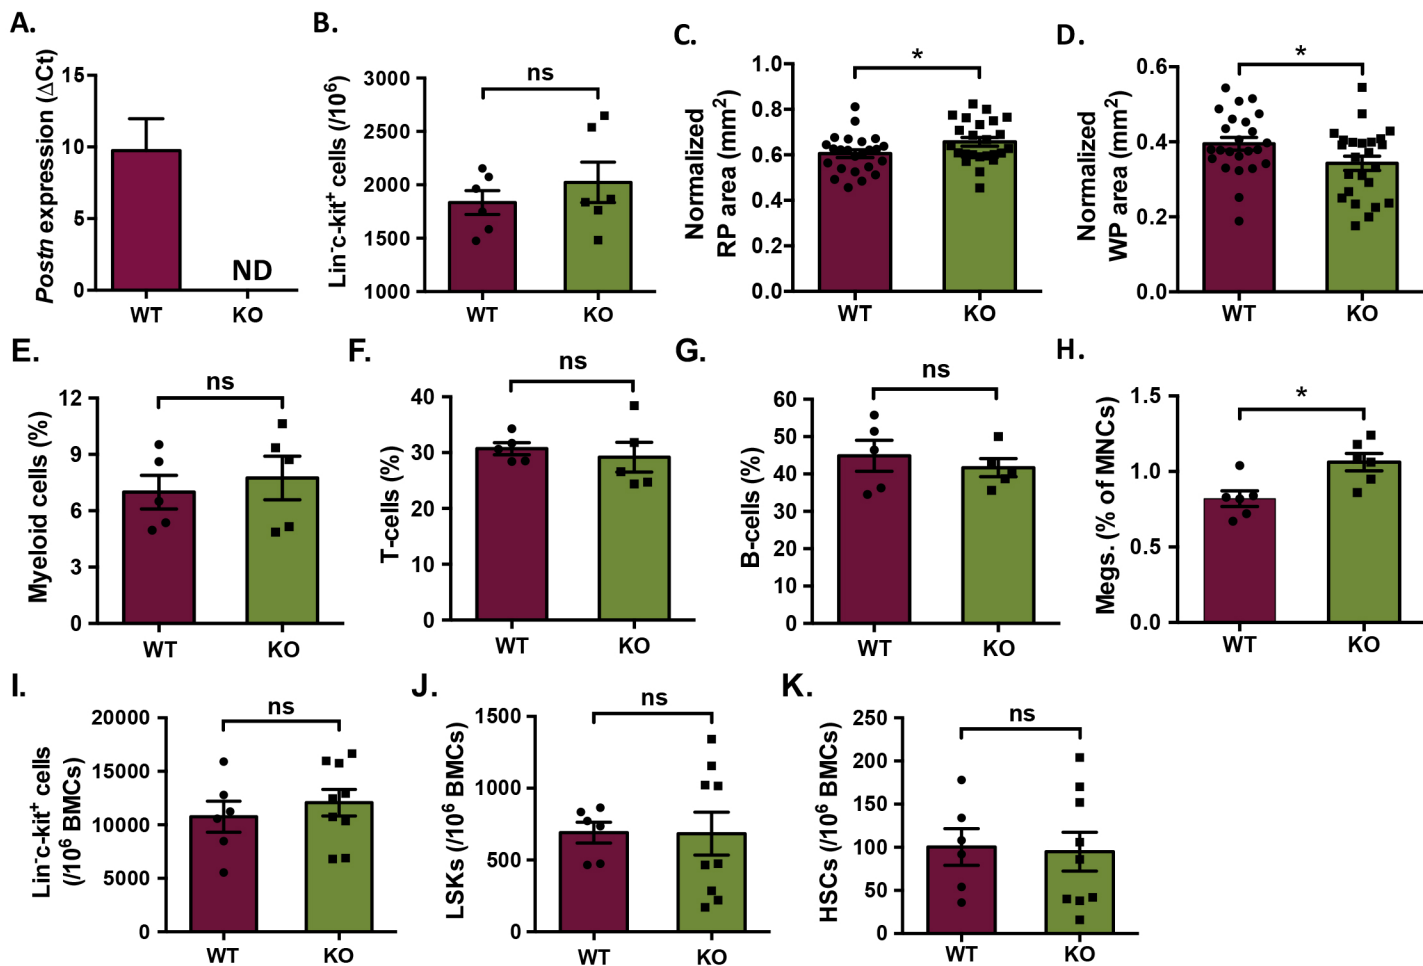

### Supplemental Figure 3. *Postn* deletion leads to poorer lymphopoietic function

(A) Confirmation of lack of *Postn* expression in spleen tissue. Splenocytes were magnetically sorted for lin<sup>-</sup>CD45<sup>-</sup> fraction and quantitative RT-PCR was performed to quantify *Postn* expression.

(B) Comparison between the WT and KO spleen tissues for the frequency of hematopoietic stem and progenitor cell population (lin<sup>c-kit</sup><sup>+</sup> cells) by flow cytometry.

(C,D) Spleen tissues isolated from WT and KO animals were harvested. The formalin-fixed, paraffin-embedded tissues were used to cut 10 $\mu$ m sections that were used for H&E staining. (C) The total cross-sectional area under red pulp (RP), and (D) white pulp (WP) per  $mm^2$  of the total spleen cross-sectional area was compared between WT and KO spleen tissues (n=4, N=24).

(E-G) Flow cytometry analysis of the spleen mononuclear cells for the proportion of (E) myeloid cells (CD11b+/Gr-1+), (F) T cells (CD4+/CD8+), (G) B-cells (B220+).

(H) Flow cytometry analysis of the spleen mononuclear cells (MNCs) for the frequency of megakaryocytes identified as CD41<sup>+</sup> cells using specific antibodies.

(I-K) CFU-S<sub>12</sub> assay was performed to assess the HSC support potential of spleen. *Postn*<sup>+/+</sup> (WT) and *Postn*<sup>-/-</sup> (KO) mice received WT BM cells following lethal dose of irradiation. After 12 days of grafting, spleen colonies were enumerated along with BM analysis for the stem cell sub-populations by flow cytometry. Quantification of frequency of various hematopoietic stem and progenitor cell populations; (I) lin<sup>c-kit</sup><sup>+</sup> cells, (J) LSK cells, (K) primitive HSCs.

Unpaired two tailed Student's t-test was performed. n=3, N=9, t test: ns indicates not significant with p $\geq$ 0.05.
